# Supplementary material for: Fluorescence enhancement of bis-acridine orange peptide, BAO, upon binding to double stranded DNA
Source: Royal Society of Chemistry journal article supplement (doi:10.1039/b417391k), 2005-01-01
Supplement: b417391k.pdf [file b417391k.pdf]

**Supporting information:** Fluorescence enhancement of bis-acridine orange peptide, BAO, upon binding to double stranded DNA

Keiji Mizuki, Yutaka Sakakibara, Hiroyuki Ueyama, Takahiko Nojima, Michinori Waki and Shigeori Takenaka\*

Department of Applied Chemistry, Faculty of Engineering, Kyushu University, Fukuoka 812-8581, Japan. E-mail: staketc@mbx.nc.kyushu-u.ac.jp

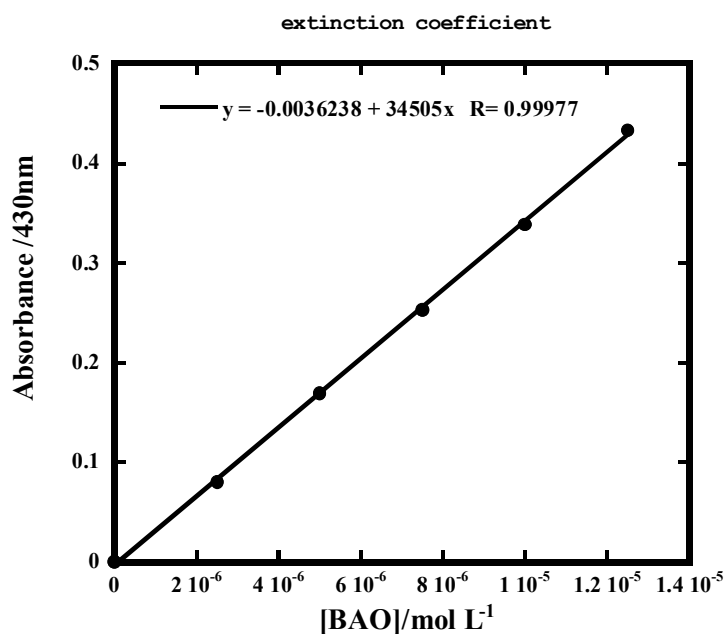

**Fig. S1** The absorption change of BAO against its concentration in 10 mM MES buffer (pH 6.25) containing 1 mM EDTA and 350 mM NaCl.
